# Supplementary material for: Highly efficient, large area, roll coated flexible and rigid OPV modules with geometric fill factors up to 98.5% processed with commercially available materials
Source: Royal Society of Chemistry journal article supplement (doi:10.1039/c5ee03315b), 2015-11-11
Supplement: c5ee03315b1.pdf [file c5ee03315b1.pdf]

## Supporting Information

### *Thickness optimization of the printed PAL through optical density measurements.*

Layers with different thicknesses were doctor-bladed on glass substrates; the optical density was measured via UV-VIS spectrometer (SHIMADZU UV-1800) and the thicknesses were measured with a profilometer (Tencor Alpha Step). In Fig. S1a the linear relation between active layer thickness and optical density peak ( $\lambda = 650$  nm) is shown. Afterwards the PAL was slot-die coated on PET films with different film thicknesses and the optical density measured. This allowed a precise determination of the printed layer thickness, as shown in Fig. S1b.

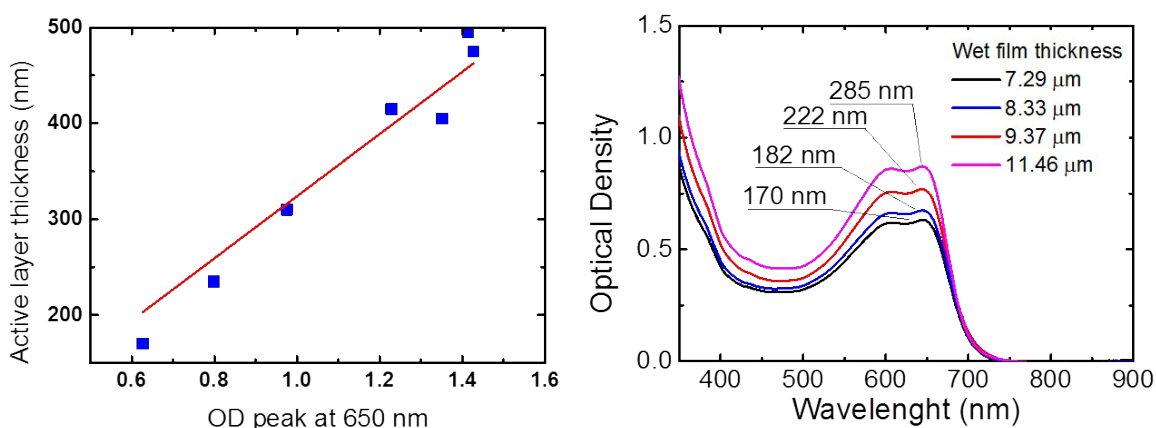

Figure S1: Active layer thickness optimization of roll coated layers by absorption measurements

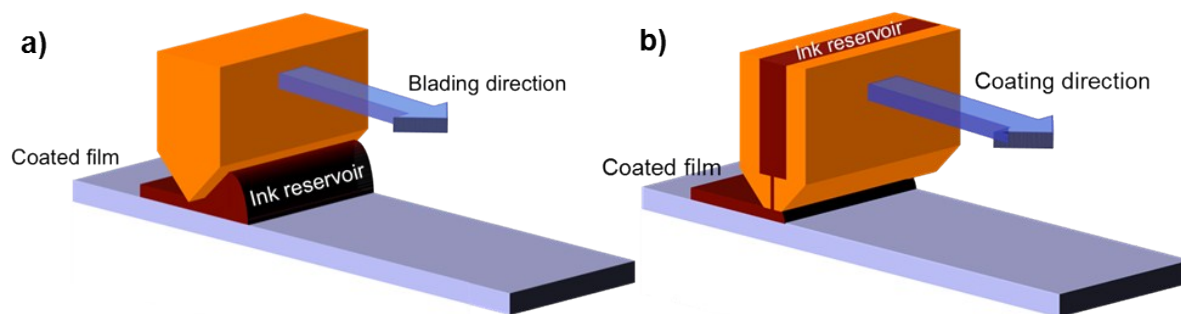

Fig. S2. a) Scheme explaining the working principle of doctor-blading and b) of slot-die coating.

*PAL thickness spatial distribution*

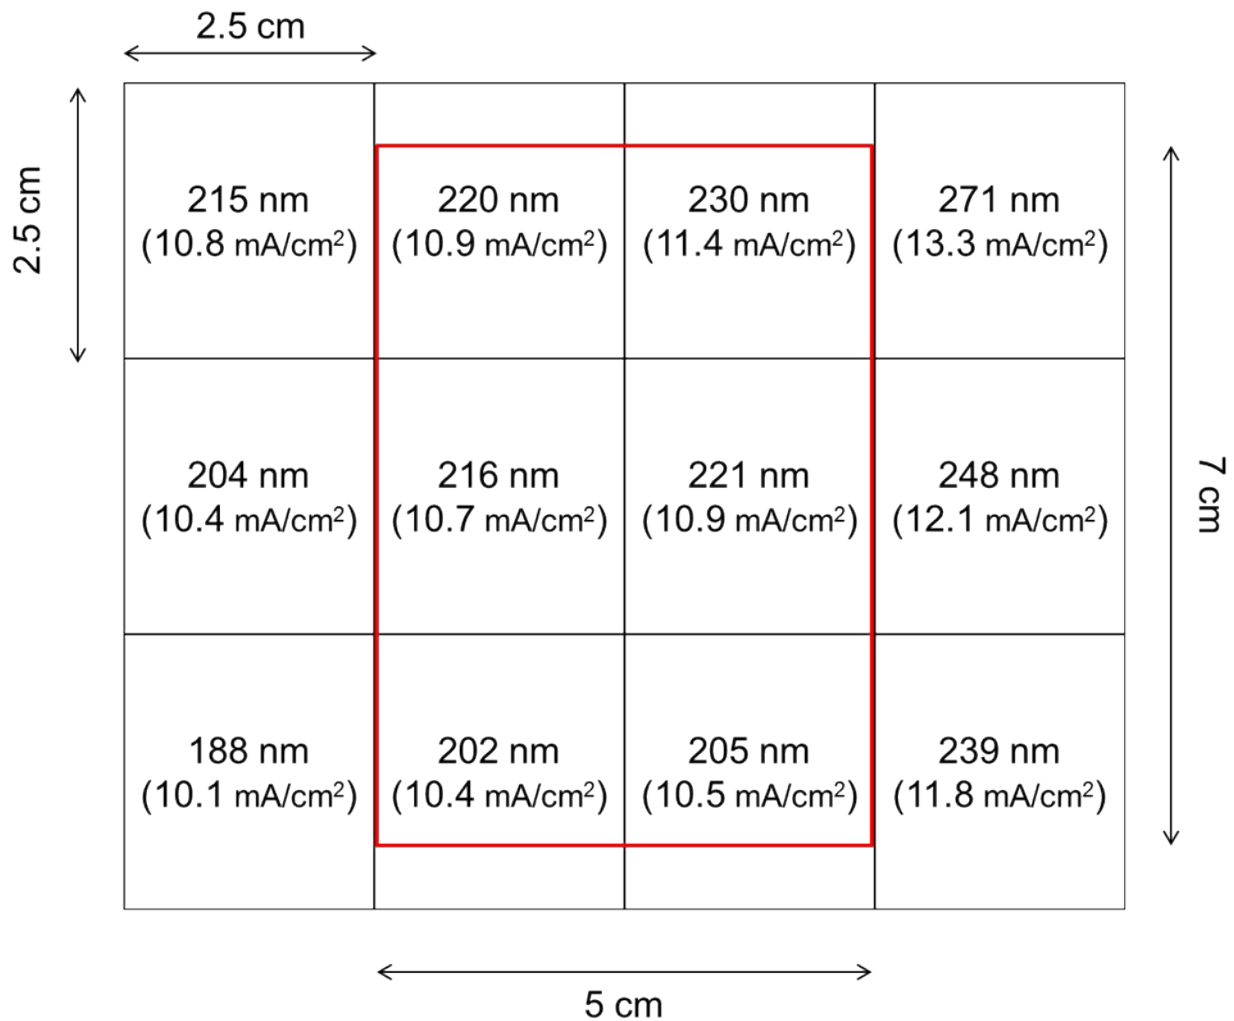

Fig. S3. Thickness distribution of the printed active layer on a bare PET substrate as determined by absorption measurements. In brackets the corresponding  $J_{sc}$  as simulated via TMF simulations. Each value is the average of two measurements performed on  $2.5 \times 2.5 \text{ cm}^2$  squares. The red rectangular shape defines the position of the printed active areas of the modules.

*DLIT imaging of the modules prepared in this work.*

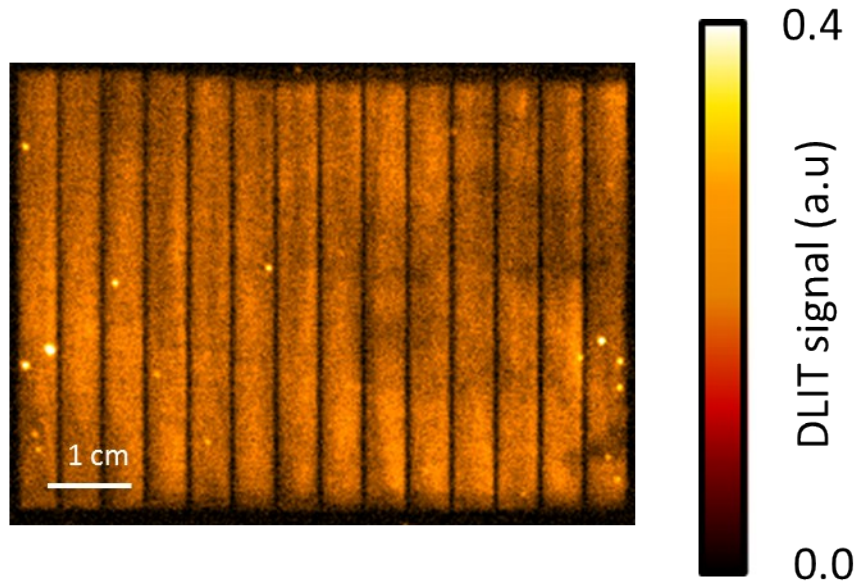

Fig. S4. DLIT image of a slot-die coated, 35 cm<sup>2</sup> module. The lock-in frequency was set to 10 Hz and the measurement was performed at 20V for 100s.
